# Supplementary material for: Mutanofactin promotes adhesion and biofilm formation of cariogenic Streptococcus mutans
Source: Springer Nature journal article supplement (doi:10.1038/s41589-021-00745-2), 2021-03-04
Supplement: 41589_2021_745_MOESM5_ESM.mol [file 41589_2021_745_MOESM5_ESM.mol]

nchembio.A200511459B-comp3.mol
  ChemDraw01182121542D

 39 41  0  0  1  0  0  0  0  0999 V2000
    4.3339   -2.2672    0.0000 C   0  0  0  0  0  0  0  0  0  0  0  0
    5.0484   -2.6797    0.0000 C   0  0  0  0  0  0  0  0  0  0  0  0
    5.7628   -2.2672    0.0000 C   0  0  0  0  0  0  0  0  0  0  0  0
    5.7628   -1.4422    0.0000 C   0  0  0  0  0  0  0  0  0  0  0  0
    5.0484   -1.0297    0.0000 C   0  0  0  0  0  0  0  0  0  0  0  0
    4.3339   -1.4422    0.0000 C   0  0  0  0  0  0  0  0  0  0  0  0
    3.6194   -1.0297    0.0000 C   0  0  0  0  0  0  0  0  0  0  0  0
    3.6194   -0.2047    0.0000 C   0  0  0  0  0  0  0  0  0  0  0  0
   -6.3832   -0.2046    0.0000 C   0  0  0  0  0  0  0  0  0  0  0  0
   -5.6687    0.2079    0.0000 C   0  0  0  0  0  0  0  0  0  0  0  0
   -4.9542   -0.2046    0.0000 C   0  0  0  0  0  0  0  0  0  0  0  0
   -4.2397    0.2078    0.0000 C   0  0  0  0  0  0  0  0  0  0  0  0
   -3.5253   -0.2047    0.0000 C   0  0  0  0  0  0  0  0  0  0  0  0
   -2.8108    0.2078    0.0000 C   0  0  0  0  0  0  0  0  0  0  0  0
   -2.0963   -0.2047    0.0000 C   0  0  0  0  0  0  0  0  0  0  0  0
   -1.3819    0.2078    0.0000 C   0  0  0  0  0  0  0  0  0  0  0  0
    2.9031    1.0297    0.0000 C   0  0  0  0  0  0  0  0  0  0  0  0
    3.6176    1.4422    0.0000 C   0  0  0  0  0  0  0  0  0  0  0  0
    3.6176    2.2672    0.0000 C   0  0  0  0  0  0  0  0  0  0  0  0
    2.9031    2.6797    0.0000 C   0  0  0  0  0  0  0  0  0  0  0  0
    2.1887    2.2672    0.0000 C   0  0  0  0  0  0  0  0  0  0  0  0
    2.1887    1.4422    0.0000 C   0  0  0  0  0  0  0  0  0  0  0  0
    2.1905   -1.0297    0.0000 O   0  0  0  0  0  0  0  0  0  0  0  0
   -0.6674   -0.2047    0.0000 C   0  0  0  0  0  0  0  0  0  0  0  0
    0.0471    0.2078    0.0000 C   0  0  0  0  0  0  0  0  0  0  0  0
    0.7616   -0.2047    0.0000 N   0  0  0  0  0  0  0  0  0  0  0  0
    1.4760    0.2078    0.0000 C   0  0  0  0  0  0  0  0  0  0  0  0
    2.1905   -0.2047    0.0000 C   0  0  0  0  0  0  0  0  0  0  0  0
    2.9050    0.2078    0.0000 N   0  0  0  0  0  0  0  0  0  0  0  0
    1.4760    1.0307    0.0000 C   0  0  0  0  0  0  0  0  0  0  0  0
    0.0471    1.0307    0.0000 O   0  0  0  0  0  0  0  0  0  0  0  0
    4.3339    0.2078    0.0000 C   0  0  0  0  0  0  0  0  0  0  0  0
    5.0876   -0.1277    0.0000 S   0  0  0  0  0  0  0  0  0  0  0  0
    5.6396    0.4854    0.0000 C   0  0  0  0  0  0  0  0  0  0  0  0
    5.2271    1.1999    0.0000 C   0  0  0  0  0  0  0  0  0  0  0  0
    4.4201    1.0283    0.0000 N   0  0  0  0  0  0  0  0  0  0  0  0
    5.5627    1.9535    0.0000 C   0  0  0  0  0  0  0  0  0  0  0  0
    5.0778    2.6210    0.0000 O   0  0  0  0  0  0  0  0  0  0  0  0
    6.3832    2.0398    0.0000 C   0  0  0  0  0  0  0  0  0  0  0  0
  1  6  1  0      
  2  1  2  0      
  3  2  1  0      
  4  3  2  0      
  5  4  1  0      
  6  5  2  0      
  7  6  1  0      
  8  7  1  6      
 29  8  1  0      
 10  9  1  0      
 11 10  2  0      
 12 11  1  0      
 13 12  2  0      
 14 13  1  0      
 15 14  2  0      
 16 15  1  0      
 24 16  2  0      
 17 22  1  0      
 18 17  2  0      
 19 18  1  0      
 20 19  2  0      
 21 20  1  0      
 22 21  2  0      
 30 22  1  0      
 28 23  2  0      
 24 25  1  0      
 25 26  1  0      
 26 27  1  0      
 27 28  1  0      
 28 29  1  0      
 27 30  1  1      
 25 31  2  0      
  8 32  1  0      
 32 33  1  0      
 33 34  1  0      
 34 35  2  0      
 35 36  1  0      
 36 32  2  0      
 35 37  1  0      
 37 38  2  0      
 37 39  1  0      
M  END
